# Supplementary material for: Multi-variate factorisation of numerical simulations
Source: Copernicus journal article supplement (doi:10.5194/gmd-14-4307-2021), 2021-07-08
Supplement: Supplementary file 2 [file gmd-14-4307-2021-supplement.zip]

Archive with 5 entries (5 files):
- Figure_Supp_1.pdf
- factor_separation.ncl
- factorize_gmd.py
- README_Supp.pdf
- gmd-14-4307-2021-supplement-title-page.pdf
