# Supplementary material for: Multi-variate factorisation of numerical simulations
Source: Copernicus journal article supplement (doi:10.5194/gmd-14-4307-2021), 2021-07-08
Supplement: Supplementary file 2 [file gmd-14-4307-2021-supplement.zip › gmd-14-4307-2021-supplement-title-page.pdf]

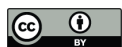

## *Supplement of*

# **Multi-variate factorisation of numerical simulations**

**Daniel J. Lunt et al.**

*Correspondence to:* Daniel J. Lunt (d.j.lunt@bristol.ac.uk)

- gmd-14-4307-2021-supplement-title-page.pdf
- Figure\_Supp\_1.pdf
- README\_Supp.pdf
- factor\_separation.ncl
- factorize\_gmd.py

The copyright of individual parts of the supplement might differ from the article licence.
