# Supplementary material for: Multi-variate factorisation of numerical simulations
Source: Copernicus journal article supplement (doi:10.5194/gmd-14-4307-2021), 2021-07-08
Supplement: Supplementary file 2 [file gmd-14-4307-2021-supplement.zip › README_Supp.pdf]

This Supplement includes ncl and python code to produce the factorisations in this paper. These are also available at:

[https://github.com/danlunt1976/factor\\_separation/blob/master/factor\\_separation.ncl](https://github.com/danlunt1976/factor_separation/blob/master/factor_separation.ncl)  
and

[https://github.com/danlunt1976/factor\\_separation/blob/master/factorize\\_gmd.py](https://github.com/danlunt1976/factor_separation/blob/master/factorize_gmd.py)

The netcdf files required to run the code are available from the University of Toronto Dataverse:

<https://doi.org/10.5683/SP2/QGK5B0>

Also included is Supplement Figure 1, the caption for which is:

*As Figure 4(j,k,l,m) but for the relative-scaled version of the Scaled Residual factorisation (i.e. Equation 24 in place of Equation 15). The pink circles highlight regions where the factorisation gives very large negative or positive compensating values for the three factors, due to the very small values of denominator term appearing in Eq. 24 at those locations.*
