# Supplementary figures and images for: Multi-variate factorisation of numerical simulations
Source: Copernicus journal article supplement (doi:10.5194/gmd-14-4307-2021), 2021-07-08

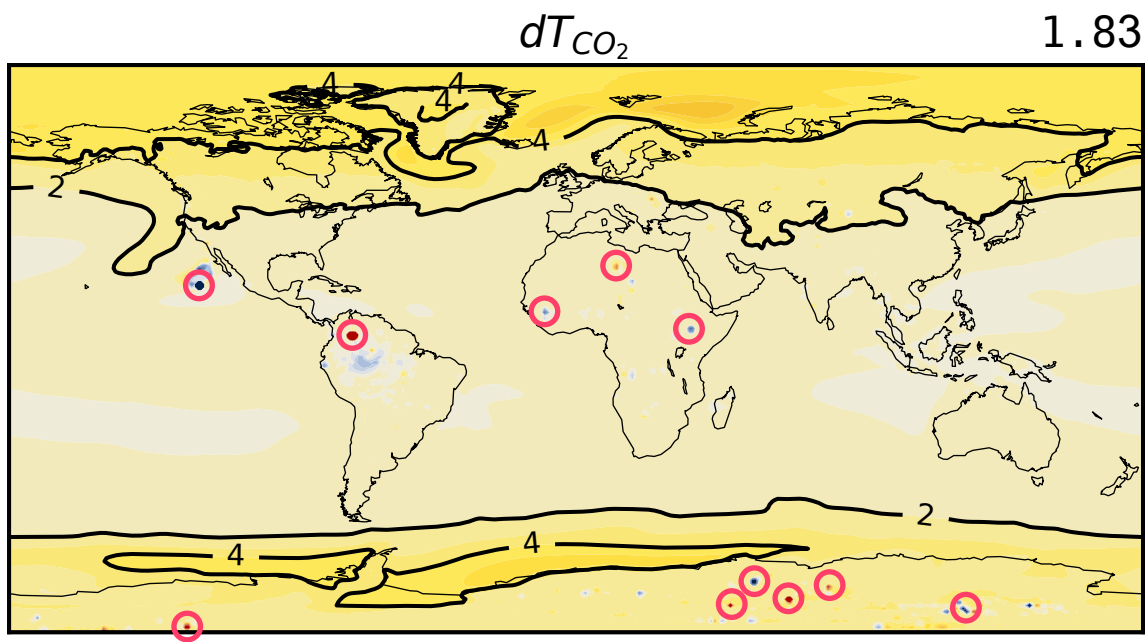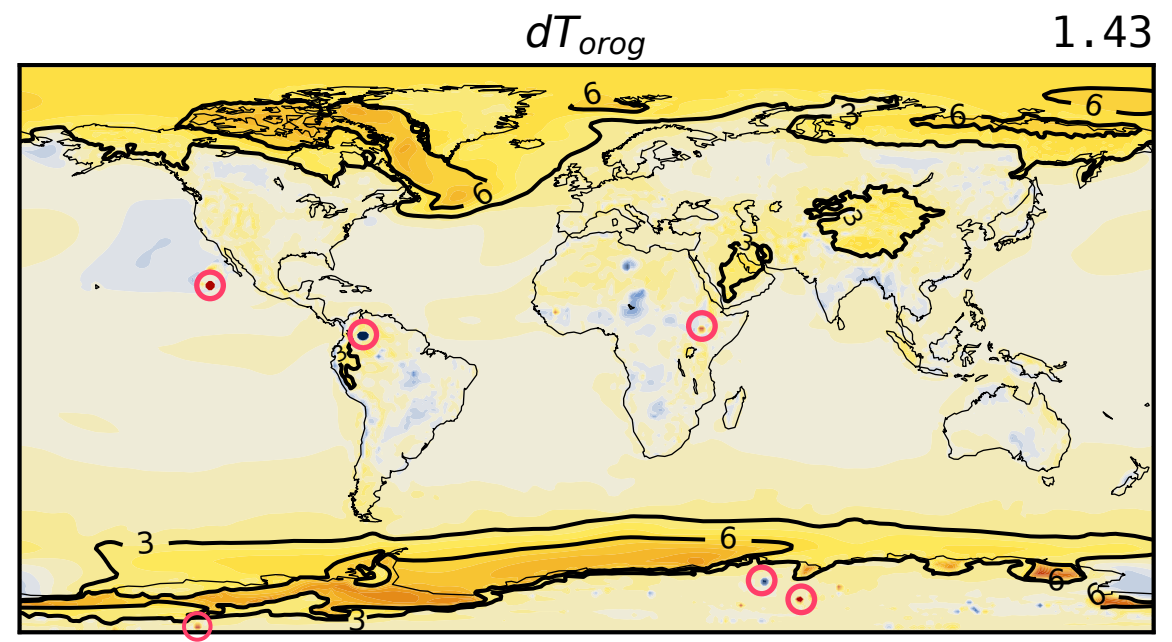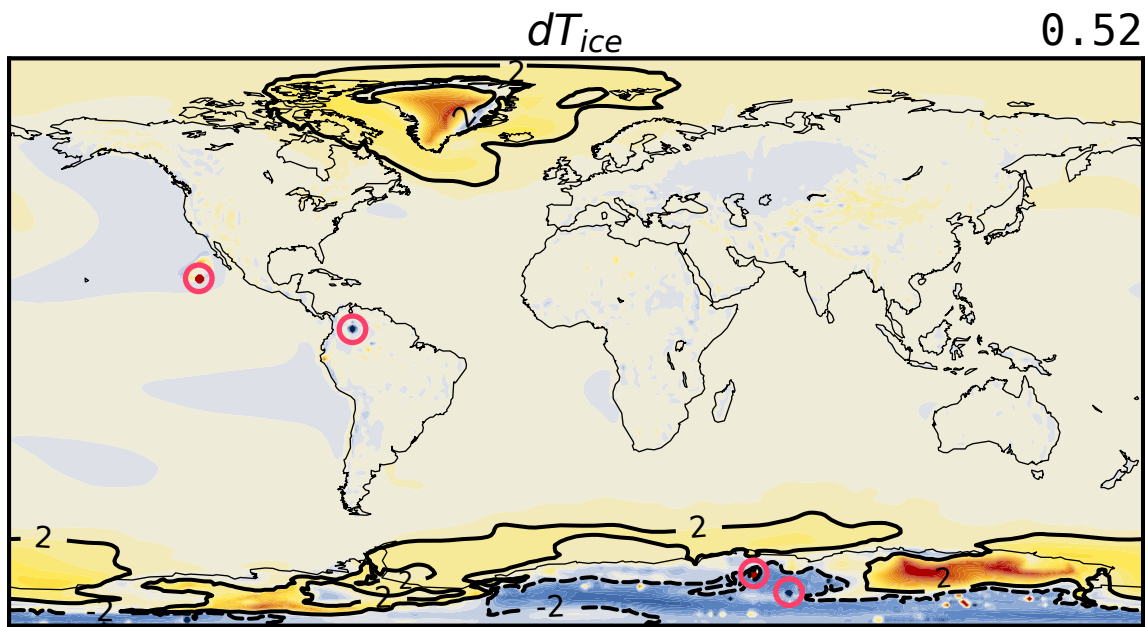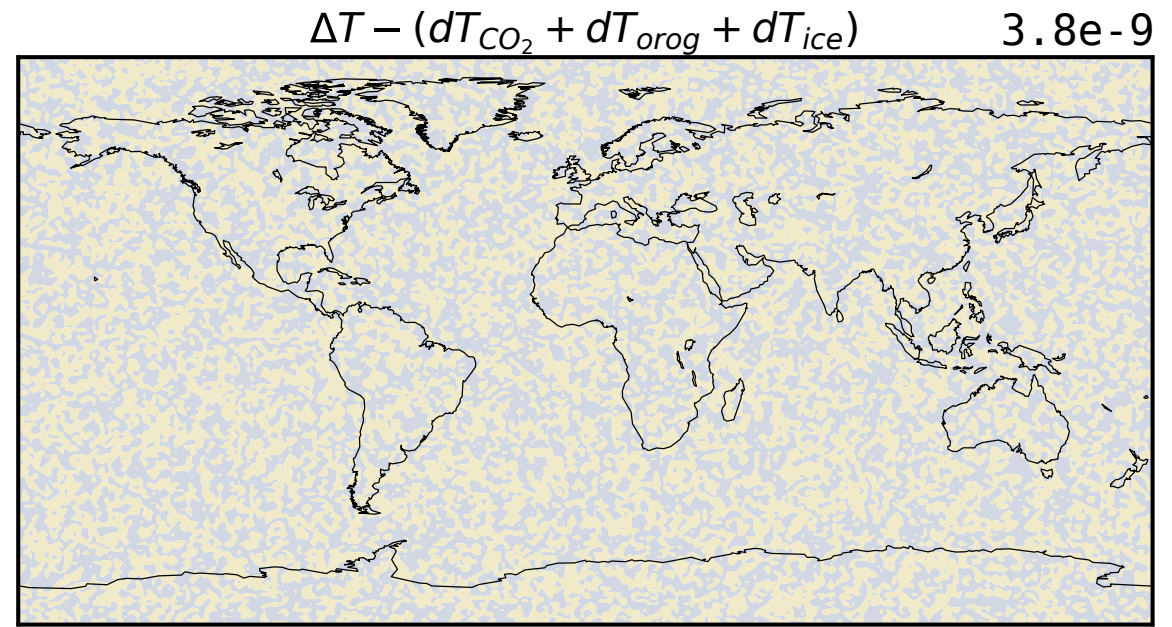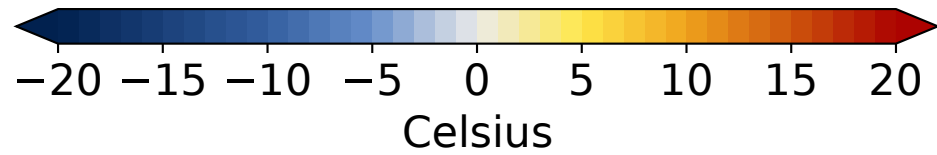

Supplement: Supplementary file 1 [file gmd-14-4307-2021-supplement.zip]
